# Supplementary material
Source: ML conference proceedings conference paper supplement (https://openreview.net/forum?id=u3ZlthX3B9)

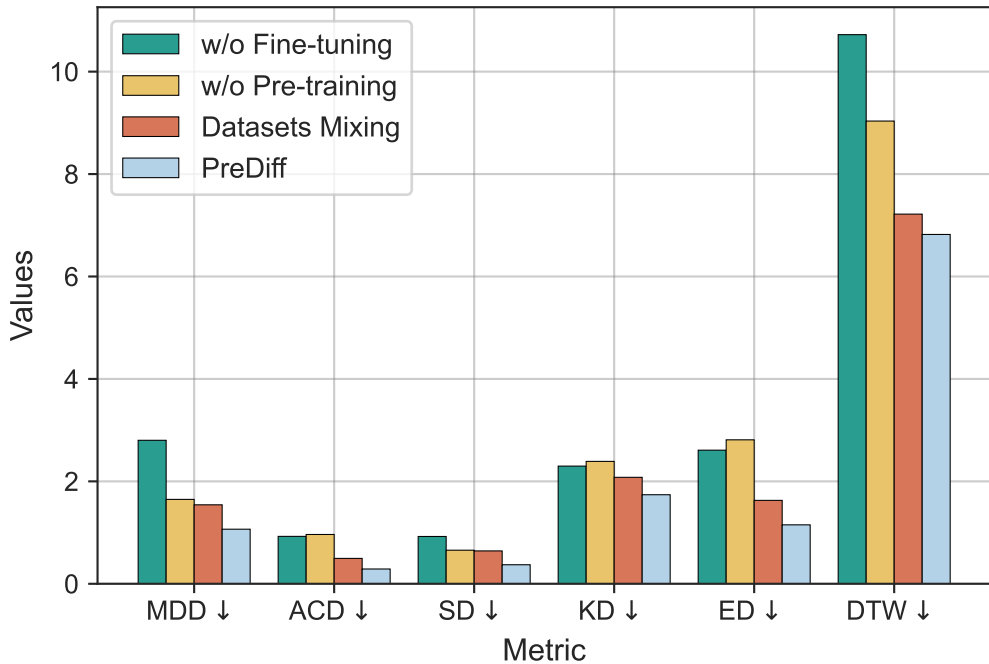

Supplement: supplementary_material [file two-stage-strategy.pdf › PreDiff/figures/two-stage-strategy.pdf]
